# Supplementary material for: The Effect of Bifidobacterium animalis ssp. lactis HN019 on Cellular Immune Function in Healthy Elderly Subjects: Systematic Review and Meta-Analysis
Source: Nutrients. 2017 Feb 24;9(3):191. doi: 10.3390/nu9030191 (PMC5372854; doi:10.3390/nu9030191)
Supplement: Supplementary file 1 [file nutrients-09-00191-s001.xlsx]

## Sheet: Sheet1
Phagocytosis
Study name	Data format	HN019 Mean	HN019 Std-Dev	HN019 Sample size	Control Mean	Control Std-Dev	Control Sample size	Effect direction	Std diff in means
Arunachalam, 2000 [39]	Independent groups (means, SD's)	320	288	13	135	69	12	Positive	0.866797
Study name	Data format	HN019 Pre Mean	HN019 Pre SD	HN019 Post Mean	HN019 Post SD	HN019 Sample size	Control Pre Mean	Control Pre SD	Control Post Mean	Control Post SD	Control Sample size	Pre Post correlation	Effect direction	Standardize by	Std diff in means
Chiang, 2000 [40]	Means, SD in each group	73	10.4	82	13	27	71	14.2	72	14.2	50	0.5	Positive	Change score SD	0.594716
Gill, 2001a [37]	Means, SD in each group	59	7.8	67.5	9.8	15	59	7.8	59	7.8	15	0.5	Positive	Change score SD	1.01133
NK Cell
Study name	Data format	HN019 Mean	HN019 Std-Dev	HN019 Sample size	Control Mean	Control Std-Dev	Control Sample size	Effect direction	Std diff in means
Gill, 2001b [36]	Independent groups (means, SD's)	34	22.4	14	22	15	14	Positive	0.629507
Study name	Data format	HN019 Pre Mean	HN019 Pre SD	HN019 Post Mean	HN019 Post SD	HN019 Sample size	Control Pre Mean	Control Pre SD	Control Post Mean	Control Post SD	Control Sample size	Pre Post correlation	Effect direction	Standardize by	Std diff in means
Chiang, 2000 [40]	Means, SD in each group	9.5	10.4	15	13	27	8	14.2	9	10.7	50	0.5	Positive	Change score SD	0.359731
Gill, 2001a [37]	Means, SD in each group	24.5	7.8	34	11.7	15	18.5	5.9	24.5	7.8	15	0.5	Positive	Change score SD	0.39617
